# Supplementary material for: Multicenter study of US trauma centers examining the effect of the COVID-19 pandemic on injury causes, diagnoses and procedures
Source: HighWire-hosted journal article supplement (doi:10.1136/tsaco-2020-000655), 2021-04-01
Supplement: tsaco-2020-000655supp001_data_supplement.pdf [file tsaco-2020-000655supp001_data_supplement.pdf]

## SUPPLEMENTAL DIGITAL CONTENT

**Supplemental Table 1.** Causes of injury by abbreviated study period to coincide with White House extended coronavirus guidelines

| Covariate           | Pre-pandemic                 | Pandemic                     | P value          |
|---------------------|------------------------------|------------------------------|------------------|
|                     | 3/11/19 - 4/30/19<br>N=1,681 | 3/11/20 - 4/30/20<br>N=1,327 |                  |
| Fall                | 42.9% (721)                  | 47.5% (630)                  | <b>0.01</b>      |
| Motor vehicle crash | 19.2% (322)                  | 13.4% (178)                  | <b>&lt;0.001</b> |
| Assault             | 5.9% (99)                    | 7.7% (102)                   | <b>0.05</b>      |
| Motorcycle crash    | 3.7% (62)                    | 4.9% (65)                    | 0.10             |
| Worksite injury     | 4.9% (83)                    | 3.6% (48)                    | 0.08             |
| Crush / strike      | 4.6% (78)                    | 3.5% (47)                    | 0.13             |
| Bicycle             | 2.0% (34)                    | 3.0% (40)                    | 0.08             |
| Home improvement    | 3.0% (50)                    | 3.1% (41)                    | 0.85             |
| Pedestrian          | 2.9% (48)                    | 2.5% (33)                    | 0.53             |
| Recreational        | 4.4% (74)                    | 1.5% (20)                    | <b>&lt;0.001</b> |
| Off-road vehicles   | 1.6% (27)                    | 3.1% (14)                    | <b>0.007</b>     |
| Firearm             | 1.3% (21)                    | 1.9% (25)                    | 0.16             |
| Self-inflicted      | 0.8% (14)                    | 1.7% (4523)                  | <b>0.03</b>      |
| Other <sup>1</sup>  | 2.9% (48)                    | 2.6% (34)                    | 0.62             |

<sup>1</sup>Other: burn (n=98), animal bite (n=59), glass/sharp object (n=38), 'other' (n=35), or unknown (n=25)

**Supplemental Table 2.** Significant differences in cause of injury for admissions (March 11 – June 30) in 2018 vs. 2019 and over time

| Cause of injury                           | 2018 vs.<br>2019 <sup>1</sup> | 2018 vs. 2019<br>vs. 2020 <sup>2</sup> |
|-------------------------------------------|-------------------------------|----------------------------------------|
| Fall                                      | 0.28                          | 0.12                                   |
| Motor vehicle crash                       | <b>0.03</b>                   | <b>&lt;0.001</b>                       |
| Assault                                   | 0.71                          | 0.51                                   |
| Motorcycle crash                          | 0.15                          | 0.90                                   |
| Worksite injury                           | 0.19                          | 0.60                                   |
| Crush / strike                            | 0.18                          | 0.20                                   |
| Bicycle                                   | 0.34                          | 0.14                                   |
| Home improvement                          | 0.95                          | 0.95                                   |
| Pedestrian                                | <b>0.01</b>                   | 0.26                                   |
| Recreational / sport<br>off-road vehicles | 0.65                          | <b>0.004</b>                           |
| Firearm                                   | 0.14                          | 0.08                                   |
| Self-inflicted                            | 0.78                          | 0.20                                   |
| Other                                     | 0.96                          | 0.12                                   |
|                                           | 0.41                          | <b>0.02</b>                            |

<sup>1</sup> P value, chi-square test

<sup>2</sup> P value, Cochran-Armitage trend test

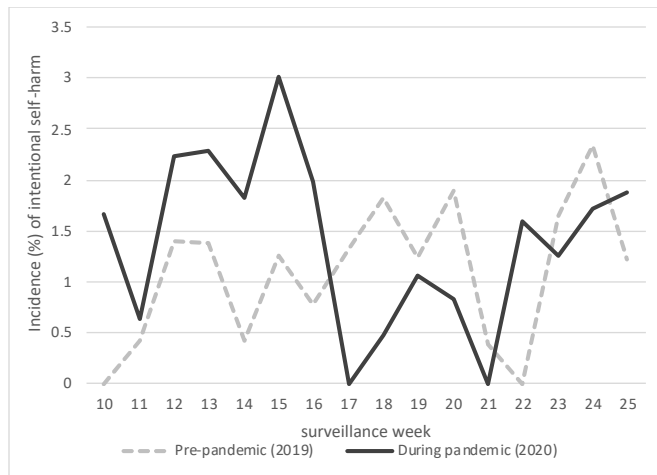

**Supplemental Figure 1.** Incidence (%) of intentional self-harm cause of injury, by surveillance week and pandemic period
